# Supplementary material for: Synthesis of the SO42−–Fe3O4/FeS coating catalyst on a TC4 titanium alloy for the enhanced Fenton-like degradation of phenol
Source: Royal Society of Chemistry journal article supplement (doi:10.1039/d0nj05014h), 2020-12-12
Supplement: d0nj05014h1.pdf [file d0nj05014h1.pdf]

## **Synthesis of $\text{SO}_4^{2-}$ - $\text{Fe}_3\text{O}_4/\text{FeS}$ coating catalyst on TC4 titanium alloy for enhanced Fenton-like degradation of phenol**

Xiao Zhang<sup>1</sup>, Jiankang Wang<sup>2</sup>, Zhongping Yao<sup>1\*</sup>, Changju Chen<sup>1</sup>, Yang Zhou<sup>1</sup> and Zhaohua Jiang<sup>1</sup>

<sup>1</sup>School of Chemistry and Chemical Engineering, State Key Laboratory of Urban Water Resource and Environment, Harbin Institute of Technology, Harbin 150001, China

<sup>2</sup>College of Materials Science and Engineering, Yangtze Normal University, Chongqing 408100, China

*\*Corresponding authors.*

[yaozhongping@hit.edu.cn](mailto:yaozhongping@hit.edu.cn)

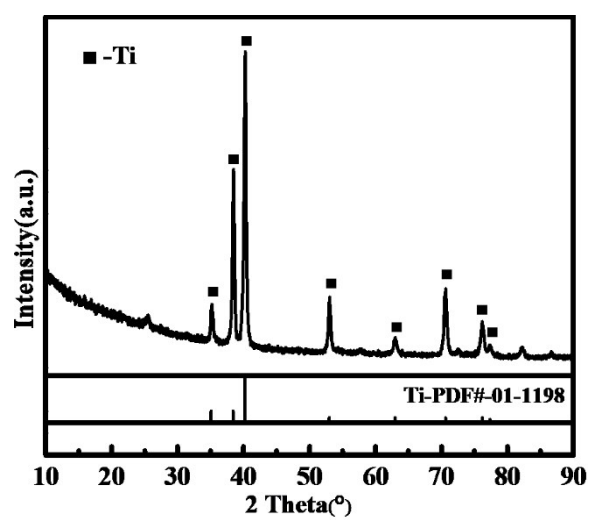

**Fig. S1** XRD patterns of PEO coatings before S modification

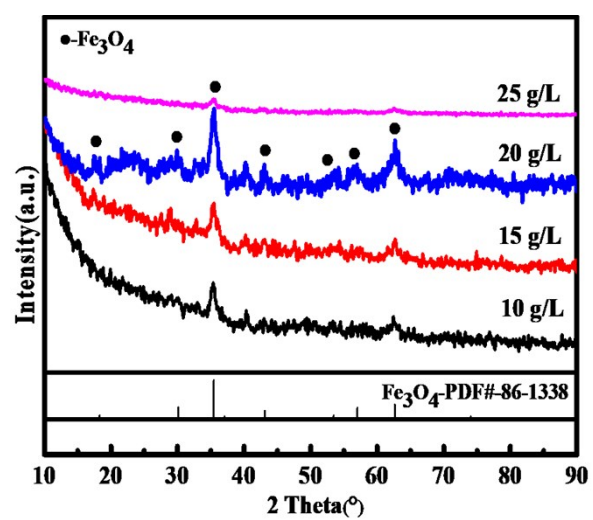

**Fig. S2** XRD patterns of PEO coatings prepared with different contents of  $\text{Na}_2\text{S}_2\text{O}_3 \cdot 5\text{H}_2\text{O}$ . (Other condition:

15

g/L

$\text{K}_3[\text{Fe}(\text{CN})_6]$ )

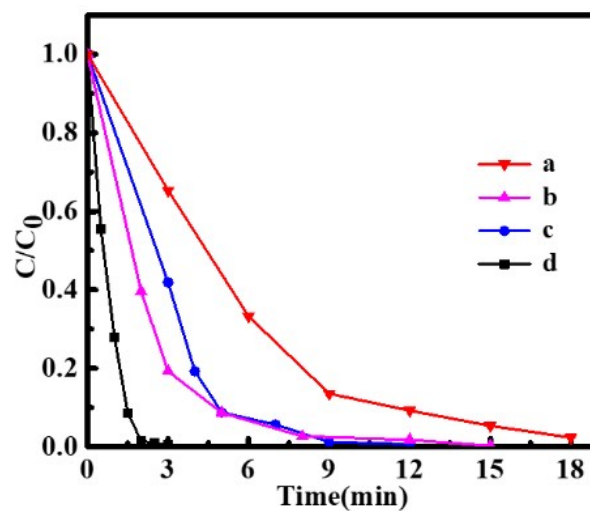

**Fig. S3** Degradation curves of phenol by PEO coatings prepared with different iron and sulfur sources: 15 g/L  $K_3[Fe(CN)_6]$ , 15 g/L  $Na_2S_2O_3 \cdot 5H_2O$  (a), 20 g/L  $K_3[Fe(CN)_6]$ , 15 g/L  $Na_2S_2O_3 \cdot 5H_2O$  (b), 15 g/L  $K_3[Fe(CN)_6]$ , 20 g/L  $Na_2S_2O_3 \cdot 5H_2O$  (c) and 20 g/L  $K_3[Fe(CN)_6]$ , 20 g/L  $Na_2S_2O_3 \cdot 5H_2O$  (d)

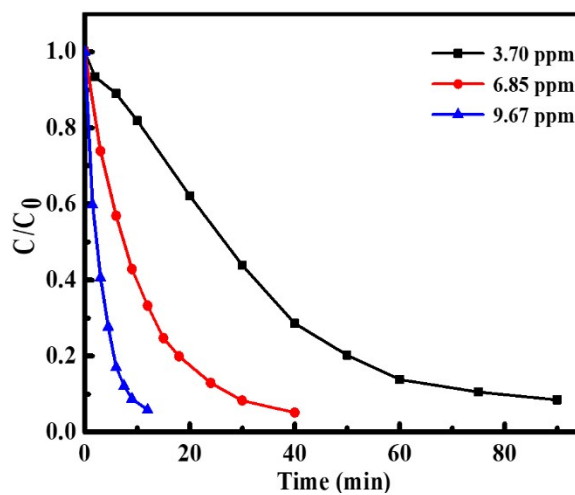

**Fig. S4** Homogeneous Fenton degradation of phenol at different  $Fe^{2+}$  concentrations. (Other conditions: pH 6.0,  $H_2O_2$  6 mmol/L, initial concentration of phenol 35 mg/L, reaction temperature 30°C)

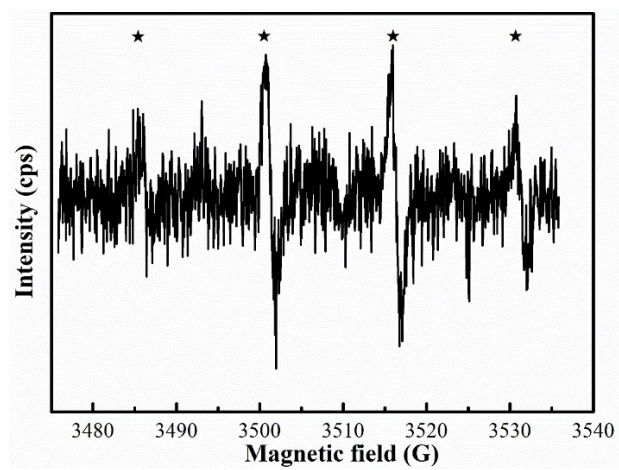

Fig. S5 EPR spectrum of DMPO-·OH in PEO coating/H<sub>2</sub>O<sub>2</sub> system
